# Supplementary material
Source: publisher figshare collection journal article supplement (https://acs.figshare.com/ndownloader/files/4300720)
Supplement: Supplementary file 1 [file 4300720]

# Borate-Catalyzed Carbon Dioxide Hydration via the Carbonic Anhydrase Mechanism

## SUPPORTING INFORMATION

*Environmental Science & Technology*

*April 2011*

Dongfang Guo,<sup>1,2</sup> Hendy Thee,<sup>2</sup> Gabriel da Silva,<sup>2\*</sup> Jian Chen,<sup>1</sup> Weiyang Fei,<sup>1</sup> Sandra Kentish,<sup>2</sup> Geoffrey W. Stevens<sup>2</sup>

<sup>1</sup> State Key Laboratory of Chemical Engineering, Department of Chemical Engineering, Tsinghua University, Beijing 100084, China.

<sup>2</sup> Department of Chemical and Biomolecular Engineering, The University of Melbourne, Victoria 3010, Australia.

\*Corresponding author: G. da Silva

(gdasilva@unimelb.edu.au; phone: +61 3 8344 6627; fax: +61 3 8344 4153)

## CONTENTS

|                                                                                                                                         |     |
|-----------------------------------------------------------------------------------------------------------------------------------------|-----|
| <b>Rate Constant Calculations</b> .....                                                                                                 | S1  |
| <b>CO<sub>2</sub>+OH<sup>-</sup> Reaction</b> .....                                                                                     | S3  |
| <b>CO<sub>2</sub>+H<sub>2</sub>O Reaction</b> .....                                                                                     | S4  |
| <b>References</b> .....                                                                                                                 | S5  |
| <b>Table S1:</b> Rate constants for the CO <sub>2</sub> + OH <sup>-</sup> reaction.....                                                 | S6  |
| <b>Table S2:</b> Rate constants for the CO <sub>2</sub> + H <sub>2</sub> O reaction.....                                                | S6  |
| <b>Table S3:</b> Rate constants for the CO <sub>2</sub> + B(OH) <sub>4</sub> <sup>-</sup> reaction.....                                 | S6  |
| <b>Figure S1:</b> CO <sub>2</sub> hydration rate versus buffer (imidazole) concentration at pH 6.8....                                  | S7  |
| <b>Figure S2:</b> CO <sub>2</sub> hydration rate constant and mechanism contribution.....                                               | S8  |
| <b>Figure S3:</b> Increase in the CO <sub>2</sub> hydration rate by borate in seawater.....                                             | S9  |
| <b>Figure S4:</b> Increase in the CO <sub>2</sub> hydration rate by borate in Mono Lake.....                                            | S10 |
| <b>Figure S5:</b> Uncatalyzed CO <sub>2</sub> hydration ( <i>k</i> <sub>obs</sub> ) rate versus [OH <sup>-</sup> ] at 20 °C to 40 °C... | S11 |
| <b>Figure S6:</b> Arrhenius plot of <i>k</i> <sub>2</sub> versus 1000/ <i>T</i> .....                                                   | S12 |
| <b>Figure S7:</b> Arrhenius plot of ln <i>k</i> <sub>1</sub> versus 1000/ <i>T</i> .....                                                | S13 |

### Rate Constant Calculations

Borate catalyzed reactions were followed by the stopped-flow pH indicator technique, in which the boric acid / borate system operates as the buffer, with thymol blue as the indicator. Under our experimental conditions the total boric acid concentration  $[BA]_{total}$  is sufficiently low that  $B(OH)_3$  is only in equilibrium with  $B(OH)_4^-$ :

$$[BA]_{total} = [B(OH)_3] + [B(OH)_4^-] \quad (S1)$$

$$K_a = \frac{[B(OH)_4^-][H^+]}{[B(OH)_3]} \quad (S2)$$

Where,  $K_a$  is the dissociation constant of boric acid.

The total reaction rate for  $CO_2$  hydration ( $r$ ,  $M\ s^{-1}$ ) can be defined as the rate of  $CO_2$  consumption:

$$r = -\frac{d[CO_2]}{dt} = k_{obs}[CO_2] \quad (S3)$$

Here,  $k_{obs}$  ( $s^{-1}$ ) is the observed pseudo-first-order rate constant. Experimental conditions have been chosen so that  $[CO_2]$  is always in large excess over  $[OH^-]$ , with constant  $[CO_2]$  assumed over the course of all experiments. Considering contributions from the  $CO_2 + OH^-$  and  $CO_2 + H_2O$  reactions, as well as possible catalysis by  $B(OH)_3$  and  $B(OH)_4^-$ , the observed rate constant can be expressed as:

$$k_{obs} = k_1 + k_2[OH^-] + k_3[B(OH)_4^-] + k_4[B(OH)_3] \quad (S4)$$

Assuming that the ionization equilibrium of the buffer and indicator are instantaneous, the initial reaction rate can be defined as follows:

$$k_{obs} = -\frac{1}{[\text{CO}_2]_0} \frac{d[\text{CO}_2]}{dt} \bigg|_{t=0} = -\frac{Q}{[\text{CO}_2]_0} \frac{dA}{dt} \bigg|_{t=0} \quad (\text{S5})$$

Where  $Q$  is the buffer factor, defined by the following relation:

$$\frac{dA}{dt} = \left( \frac{\partial A}{\partial x} \right)_t \left( \frac{d[\text{H}^+]}{dt} \right) = \frac{1}{Q} \frac{d[\text{H}^+]}{dt} = \frac{1}{Q} \frac{d[\text{CO}_2]}{dt} \quad (\text{S6})$$

The buffer factor is obtained via Eqn (S7). In this equation  $C_B$ ,  $C_{In}$  are the total buffer and indicator concentrations, respectively;  $\alpha_B$ ,  $\alpha_{In}$  are mole fractions of the base forms of the buffer and indicator, respectively;  $b$  is the optical path length;  $\Delta\epsilon$  is the difference in extinction coefficients between the acid and base forms of indicator.

$$Q = \frac{\alpha_B (1 - \alpha_B) C_B}{\alpha_{In} (1 - \alpha_{In}) b C_{In} \Delta\epsilon} \quad (\text{S7})$$

Values calculated according to Eqn (S7) were found to agree well with experimental values obtained via spectrophotometric titration of the buffer-indicator system.

In general, the buffer factor is a complicated function of the states of ionization of buffer and indicator, and this quantity changes to some extent during the course of reaction<sup>1</sup>. If a buffer and indicator have nearly identical  $\text{pK}_a$  values, variation in the buffer factor can be minimized by observing the reaction kinetics over a period in which pH does not change significantly<sup>1,2</sup>. In the present work, boric acid and thymol blue have similar  $\text{pK}_a$  values, which have been published at different temperatures and ionic strengths<sup>3,4</sup>. For the stopped-flow experiments reported here, kinetic data was analyzed over a short reaction period, in which the pH change was measured to be small ( $< 0.02$  pH units), allowing us to ignore any variation in  $Q$  over the course of the reaction.

### CO<sub>2</sub> + OH<sup>-</sup> Reaction

The reaction of CO<sub>2</sub> with OH<sup>-</sup> was followed by observing the decrease in [OH<sup>-</sup>], which can be derived from the absorbance change of thymol blue. Experiments were performed in the pH range 8.4 to 9.7 at 20 °C to 40 °C, in the absence of buffer.

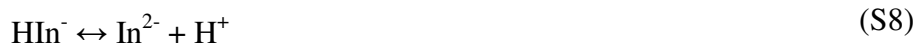

$$K_{\text{In}} = \frac{[\text{In}^{2-}][\text{H}^+]}{[\text{HIn}^-]} \quad (\text{S9})$$

where HIn<sup>-</sup> and In<sup>2-</sup> are the acid and base form of thymol blue, respectively; K<sub>In</sub> is the second dissociation constant of thymol blue. The absorbance of indicator can be defined as the product of the concentration and the extinction coefficient (ε) for the acid and base forms:

$$A = \epsilon_{\text{HIn}^-} [\text{HIn}^-] + \epsilon_{\text{In}^{2-}} [\text{In}^{2-}] \quad (\text{S10})$$

Combing Eqns (S9) and (S10) yields:

$$[\text{OH}^-] = \frac{(\epsilon - \epsilon_{\text{HIn}^-}) K_{\text{w}}}{(\epsilon_{\text{In}^{2-}} - \epsilon) K_{\text{In}}} \quad (\text{S11})$$

Figure S5 shows a plot of the observed rate constant (*k*<sub>obs</sub>) versus [OH<sup>-</sup>], demonstrating a good linear fit. Rate constants *k*<sub>2</sub>, obtained from the slope of *k*<sub>obs</sub> versus [OH<sup>-</sup>] are provided in Table S1 from 20 °C to 40 °C. Fitting these rate constants to the Arrhenius equation (Figure S6) provides an activation energy of 57.8 kJ mol<sup>-1</sup> and the rate constant expression *k*<sub>2</sub> [M<sup>-1</sup> s<sup>-1</sup>] = 9.88×10<sup>13</sup>exp(-6956/*T* [K]), which are in agreement with values previously reported in the literature.

### *CO<sub>2</sub> + H<sub>2</sub>O Reaction*

The rate constant for reaction of CO<sub>2</sub> with H<sub>2</sub>O was measured in imidazole buffer solutions with 4-nitrophenol as indicator, at around pH 7.0. At this pH reaction of CO<sub>2</sub> with the hydroxide ion is minor, but cannot be ignored. In order to account for the effect of the buffer on CO<sub>2</sub> hydration the overall reaction rate was measured at different buffer concentrations, with the true rate constant then determined by extrapolating to zero buffer concentration. Experiments were also run at the same conditions in the presence of boric acid to see if B(OH)<sub>3</sub> can catalyze CO<sub>2</sub> hydration (at around pH 7 B(OH)<sub>3</sub> is the dominant boron compound).

Temperature-dependent rate constants,  $k_1$  (s<sup>-1</sup>), are listed in Table S2, obtained by extrapolating rate constants from Figure S1 to zero buffer concentration, then subtracting the contribution due to the hydroxyl mechanism,  $k_2[\text{OH}^-]$ , using rate constants determined above. Our measured values for  $k_1$  are in general agreement with available literature data [8, 10]. Figure S1 also indicates that B(OH)<sub>3</sub> is not a significant catalyst for CO<sub>2</sub> hydration, by comparison of the experimental results with and without boric acid. An inverse log plot of rate constants for the CO<sub>2</sub> + H<sub>2</sub>O reaction are plotted in Figure S7, where we observe a good linear relationship corresponding to  $k_1 [\text{s}^{-1}] = 4.07 \times 10^6 \exp(-5584/T [\text{K}])$ , with activation energy of 46.4 kJ mol<sup>-1</sup>.

## References

1. Khalifah, R. G. The Carbon Dioxide Hydration Activity of Carbonic Anhydrase. *J. Biol. Chem.* **246**, 2561-2573 (1971).
2. Gibbons, B.H., Edsall, J. T. Rate of Hydration of Carbon Dioxide and Dehydration of Carbonic Acid at 25°. *J. Biol. Chem.* **238**, 3502-3507 (1963).
3. Goldberg, R.N., Kishore, N., Lennen, R. M. Thermodynamic Quantities for the Ionization Reactions of Buffers. *J. Phys. Chem. Ref. Data* **31**, 231-370 (2002).
4. Yamazaki, H., Sperline, R. P., Freiser, H. Spectrophotometric determination of pH and its application to determination of thermodynamic equilibrium constants. *Anal. Chem.* **64**, 2720-2725 (1992).

**Table S1: Rate constants for the CO<sub>2</sub> + OH<sup>-</sup> reaction**

| $T$ (°C)                                 | 20       | 25       | 30        | 35        | 40        |
|------------------------------------------|----------|----------|-----------|-----------|-----------|
| $k_2$ (M <sup>-1</sup> s <sup>-1</sup> ) | 5200±150 | 6830±200 | 10340±300 | 15900±370 | 22700±720 |

**Table S2: Rate constants for the CO<sub>2</sub> + H<sub>2</sub>O reaction**

| $T$ (°C)                 | 25            | 30            | 35            | 40            |
|--------------------------|---------------|---------------|---------------|---------------|
| $k_1$ (s <sup>-1</sup> ) | 0.0298±0.0007 | 0.0409±0.0008 | 0.0553±0.0011 | 0.0729±0.0015 |

**Table S3: Rate constants for the CO<sub>2</sub> + B(OH)<sub>4</sub><sup>-</sup> reaction**

| $T$ (°C)                                 | 25       | 30       | 35       | 40        |
|------------------------------------------|----------|----------|----------|-----------|
| $k_3$ (M <sup>-1</sup> s <sup>-1</sup> ) | 35.3±2.0 | 51.6±2.3 | 81.6±2.7 | 128.9±4.4 |

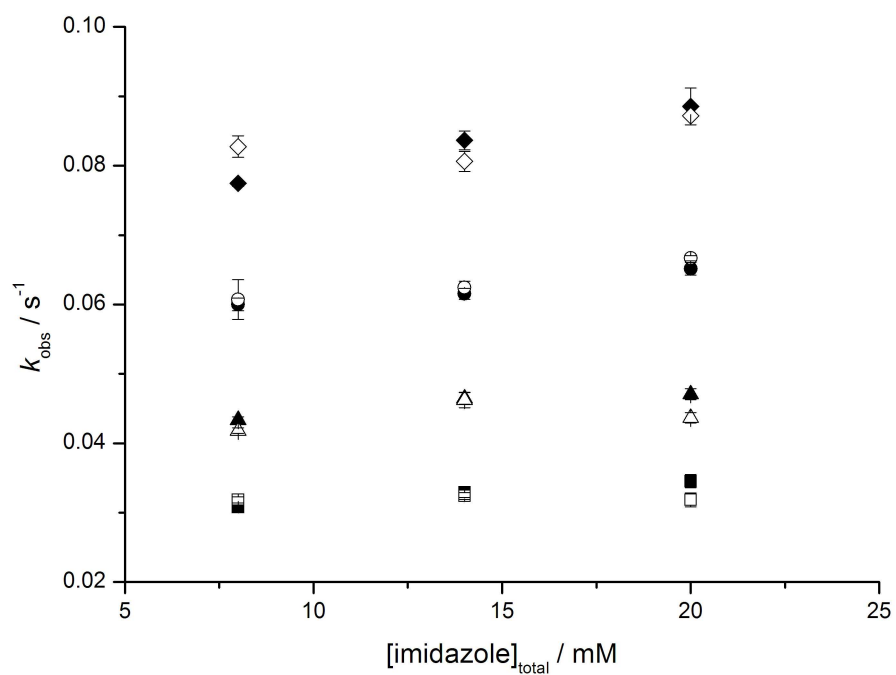

**Figure S1:** CO<sub>2</sub> hydration rate versus buffer (imidazole) concentration at pH 6.8. Solid symbols: without boric acid; filled symbols: 4.0 mM boric acid added (■/□: 25 °C; ▲/△: 30 °C; ●/○: 35 °C; ◆/◇: 40 °C).



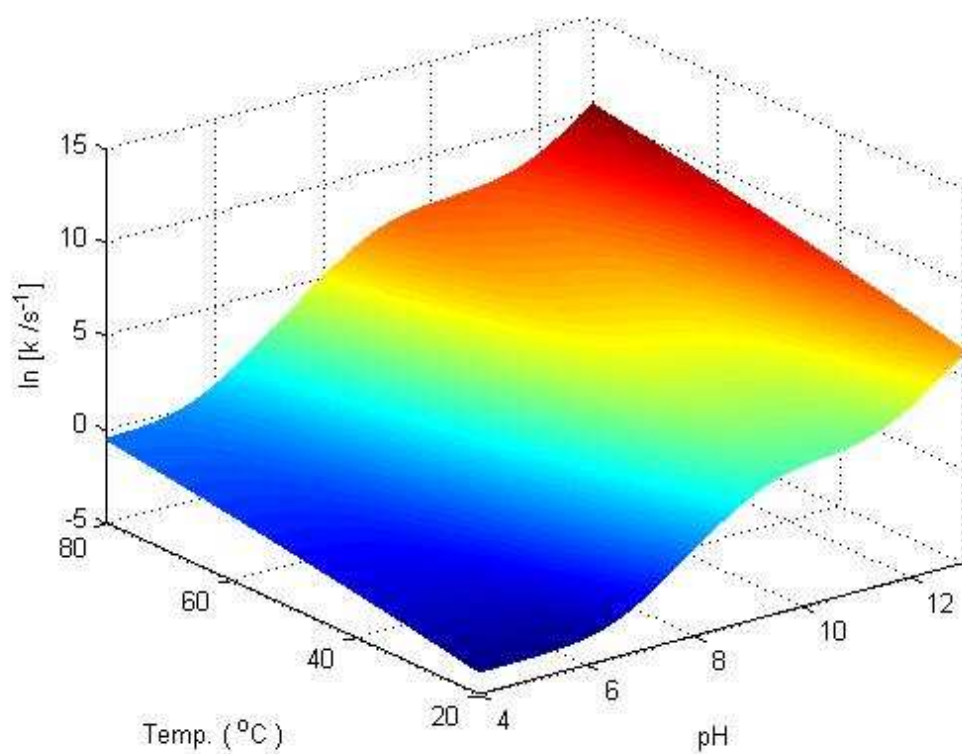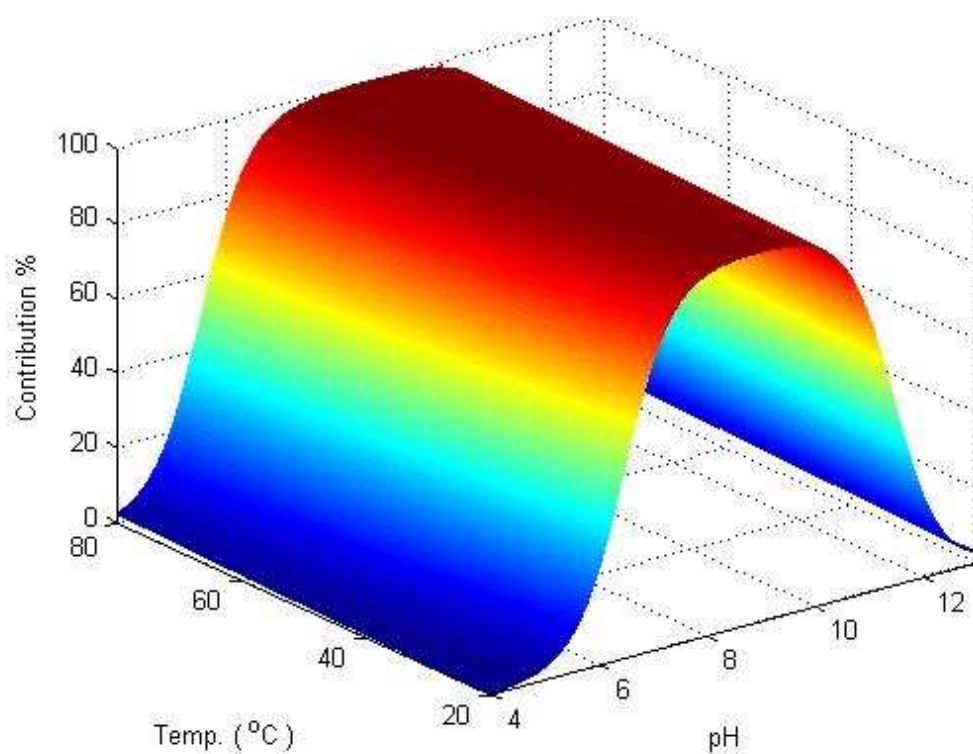

**Figure S2:** CO<sub>2</sub> hydration rate constant and mechanism contribution as a function of pH (4 – 13) and temperature (20 °C to 80 °C) with 0.65 M total added boric acid [top: total catalyzed hydration rate; bottom: contribution of B(OH)<sub>4</sub><sup>-</sup> ion catalysis].

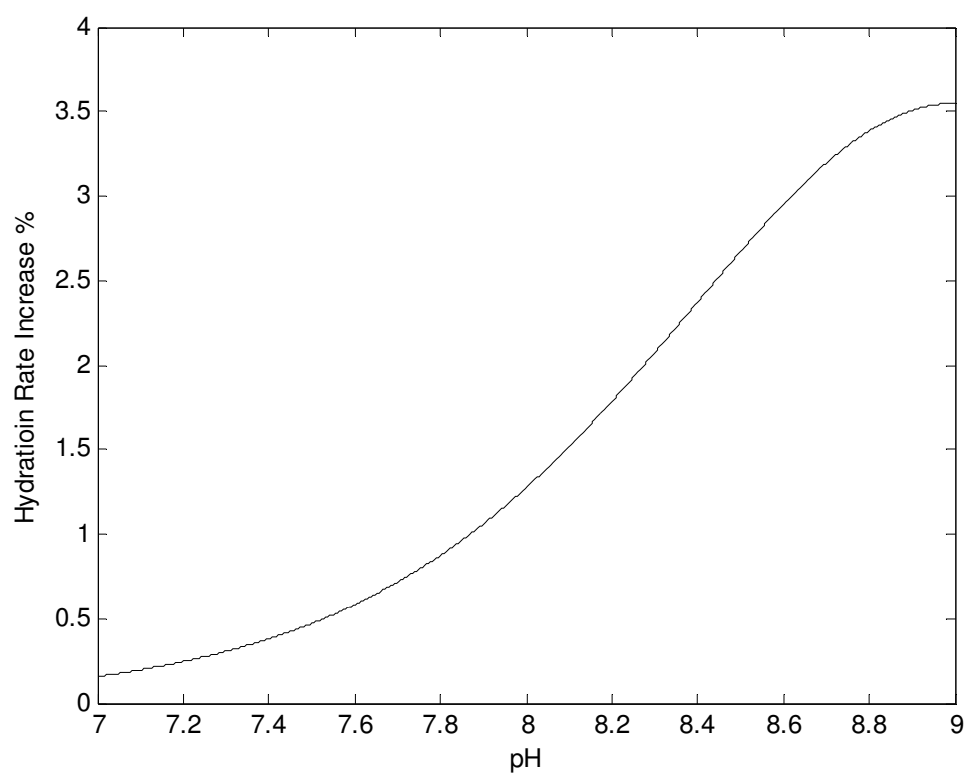

**Figure S3:** Increase in the CO<sub>2</sub> hydration rate by borate in seawater (0.4 mM boron, 15 °C).

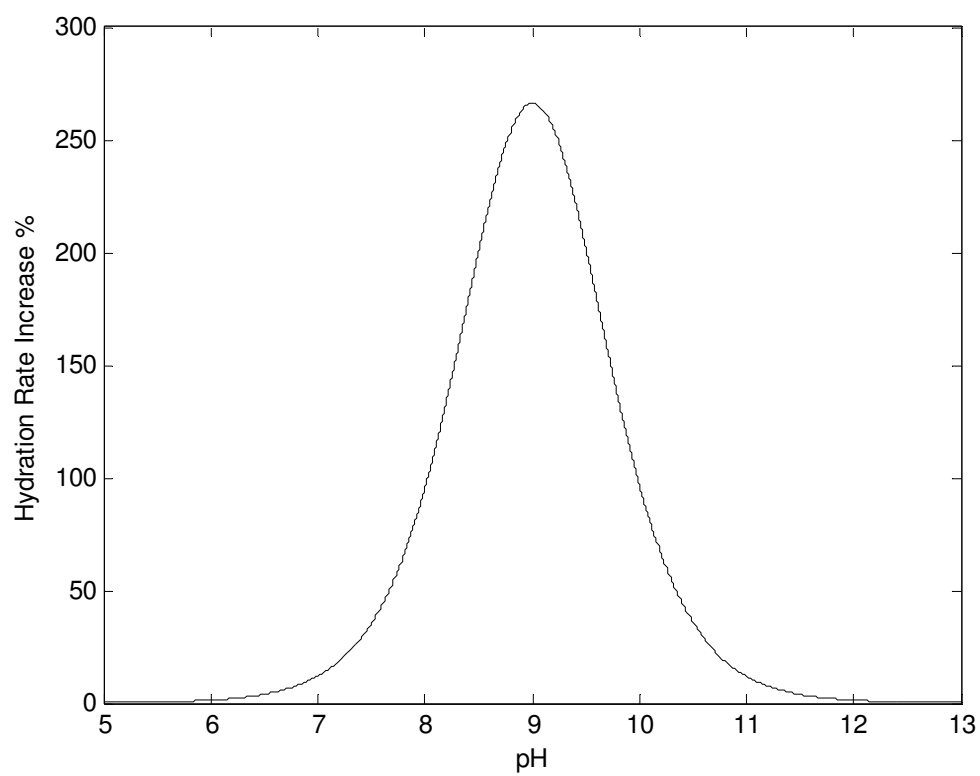

**Figure S4:** Increase in the CO<sub>2</sub> hydration rate by borate in Mono Lake (30 mM boron, 15 °C).

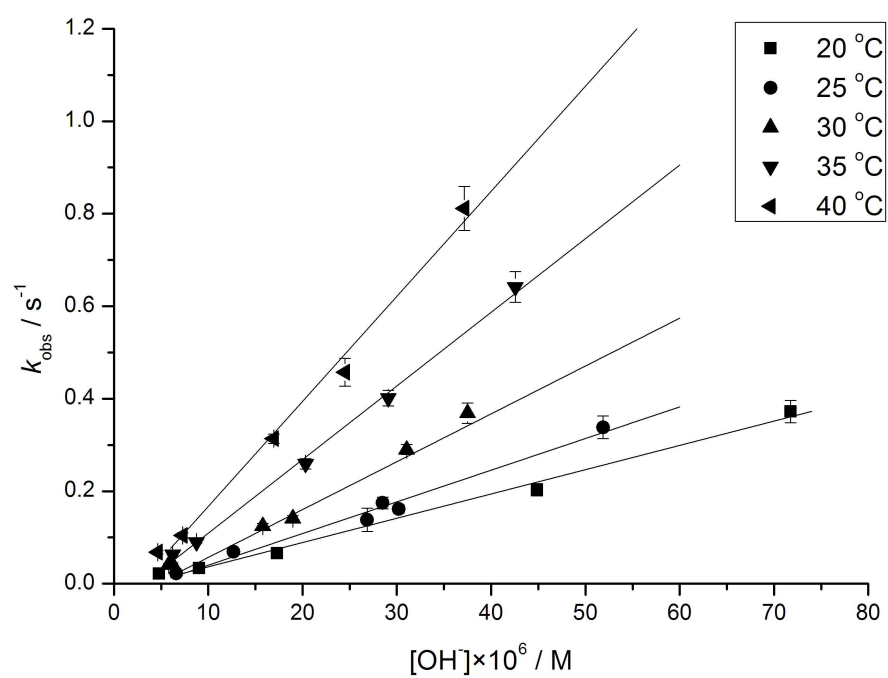

**Figure S5:** Uncatalyzed  $\text{CO}_2$  hydration ( $k_{\text{obs}}$ ) rate versus  $[\text{OH}^-]$  at 20 °C to 40 °C.

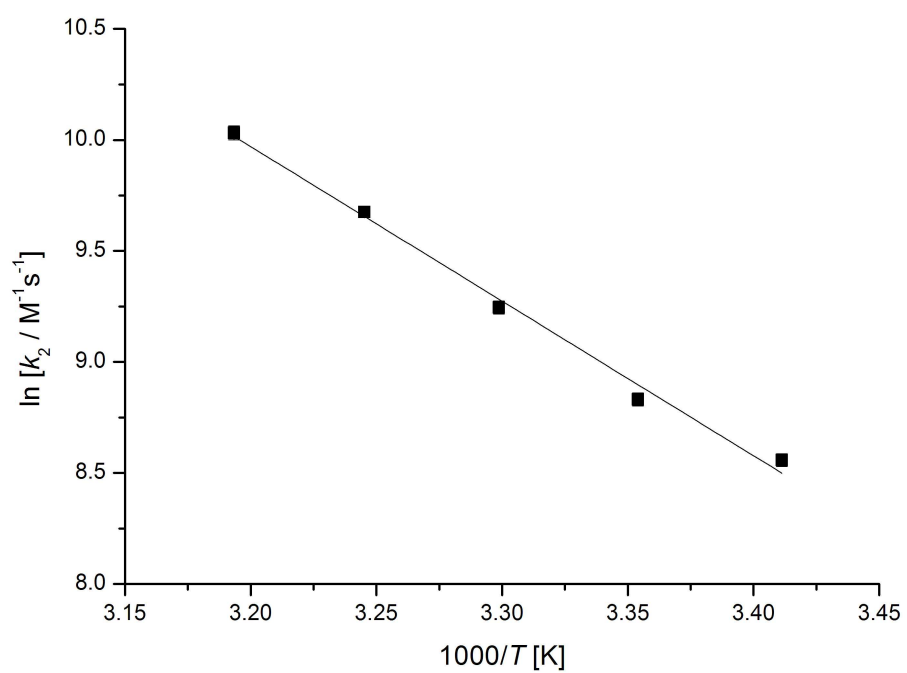

**Figure S6:** Arrhenius plot of  $k_2$  versus  $1000/T$ .

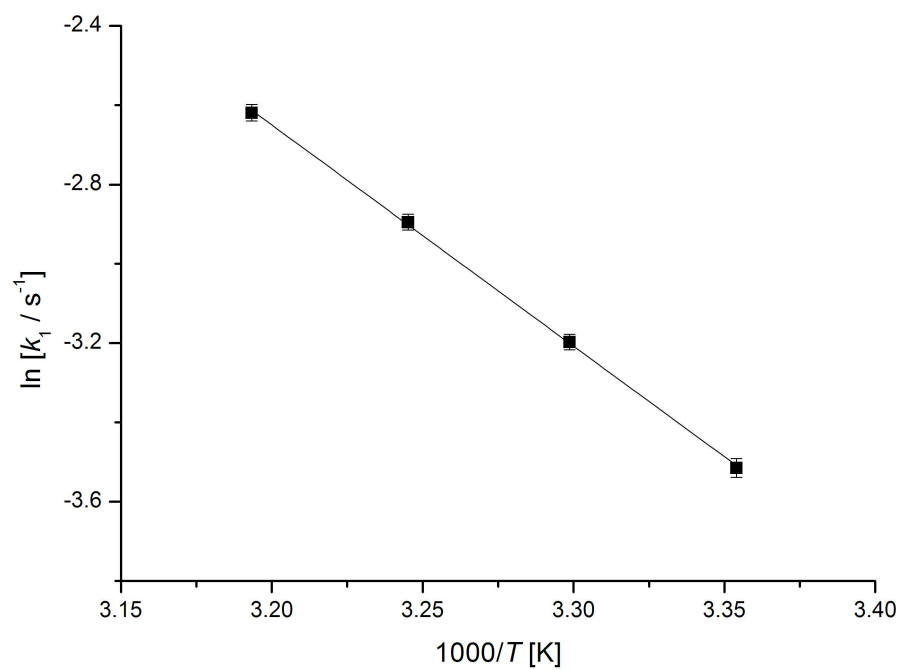

**Figure S7:** Arrhenius plot of  $\ln k_1$  versus  $1000/T$ .
